# Supplementary material
Source: ML conference proceedings conference paper supplement (https://openreview.net/forum?id=GGbBXSkX3r)
Supplement: supplementary_material [file attachment]

## A The Loss Functions for the Proposed Model

In Sec. 5, we provided the key idea of the proposed learning model. Here, we provide a detailed explanation of the loss functions implementing the learning model described in Fig. 3 of the main paper. Table 3 shows the notations for observation sets.

Table 3: The notations for observation sets

|                     | Notation                                               |
|---------------------|--------------------------------------------------------|
| Source domain       | $O_S = O_{SE} \cup O_{SN}$                             |
| Target domain       | $O_T = O_{TN} \cup O_{TL}$                             |
| Expert behavior     | $O_E = O_{SE}$                                         |
| Non-expert behavior | $O_N = O_{SN} \cup O_{TN}$                             |
| All observations    | $O_{ALL} = O_{SE} \cup O_{SN} \cup O_{TN} \cup O_{TL}$ |

The observation sets  $O_{SE}, O_{SN}, O_{TN}$  and  $O_{TL}$  are defined in Sec. 3 of the main paper.

### A.1 Dual Feature Extraction

The left side of Fig. 3 shows the basic adversarial learning block for dual feature extraction. That is, we adopt two encoders in each of the source and target domains: *domain encoder* and *behavior encoder*. *Behavior encoders* ( $BE_S, BE_T$ ) learn to obtain *behavior feature vectors* from images that only preserve the behavioral information and discard the domain information. Here, subscript  $S$  or  $T$  denotes the domain from which each encoder takes input. *Domain encoders* ( $DE_S, DE_T$ ) learn to obtain *domain feature vectors* which preserve only the domain information and discard the behavioral information. The encoders learn to optimize the WGAN objective [2, 16] based on the *feature discriminators*: behavior discriminator  $BD_*$  and domain discriminator  $DD_*$ . Discriminators  $BD_B$  and  $DD_B$  are associated with the behavior encoder  $BE_X$ , where  $X = S$  or  $T$ , and Discriminators  $BD_D$  and  $DD_D$  are associated with the domain encoder  $DE_X$ , where  $X = S$  or  $T$ .  $BD_B$  learns to identify the *behavioral* information from behavior feature vectors, and  $DD_B$  learns to identify the *domain* information from behavior feature vectors.  $BD_D$  learns to identify the *behavioral* information from domain feature vectors, and  $DD_D$  learns to identify the *domain* information from domain feature vectors. For notational simplicity, we define functions  $BE$  and  $DE$  as

$$BE(o) = \begin{cases} BE_S(o) & \text{if } o \in O_S \\ BE_T(o) & \text{if } o \in O_T \end{cases} \quad (1)$$

$$DE(o) = \begin{cases} DE_S(o) & \text{if } o \in O_S \\ DE_T(o) & \text{if } o \in O_T. \end{cases} \quad (2)$$

Two loss functions are defined for the dual feature extraction: *feature prediction loss* and *feature adversarial loss*.

1) *Feature prediction loss*: This loss makes the model retain the desired information from feature vectors and is given by

$$L_{feat}^{pred} = - \left( \mathbb{E}_{o \in O_E} [BD_B(BE(o))] - \mathbb{E}_{o \in O_N} [BD_B(BE(o))] \right. \\ \left. + \mathbb{E}_{o \in O_S} [DD_D(DE(o))] - \mathbb{E}_{o \in O_T} [DD_D(DE(o))] \right) \quad (3)$$

where  $\mathbb{E}_{o \in A}[\cdot]$  is the expectation over inputs  $o \in A$ . The first term  $\mathbb{E}_{o \in O_E} [BD_B(BE(o))]$  in the right-hand side (RHS) of (3) means that if the input observation of the encoder  $BE(\cdot)$  is from the expert observation set  $O_E$ , then the discriminator  $BD_B$  with the extracted feature should declare a high value. The second term  $-\mathbb{E}_{o \in O_N} [BD_B(BE(o))]$  in the right-hand side (RHS) of (3) means that if the input observation of the encoder  $BE(\cdot)$  is from nonexpert observation set  $O_N$ , then the discriminator  $BD_B$  with the extracted feature should declare a low value. The third term  $\mathbb{E}_{o \in O_S} [DD_D(DE(o))]$  in the right-hand side (RHS) of (3) means that if the input observation of the encoder  $DE(\cdot)$  is from the source-domain set  $O_S$ , then the discriminator  $DD_D$  with the extracted feature should declare a high

value. The fourth term  $-\mathbb{E}_{o \in O_T}[DD_D(DE(o))]$  in the right-hand side (RHS) of (3) means that if the input observation of the encoder  $DE(\cdot)$  is from the target-domain set  $O_T$ , then the discriminator  $DD_D$  with the extracted feature should declare a low value. Since we define a loss function, we have the negative sign in front of the RHS of (3). (Note that  $BD_B$  learns to assign higher values to expert behavior and to assign lower values to non-expert behavior.  $DD_D$  learns to assign higher values to the source domain and to assign lower values to the target domain.) The encoders ( $BE$ ,  $DE$ ) help discriminators ( $BD_B$ ,  $DD_D$ ) to identify the behavioral or domain information from the input, and they jointly learn to minimize  $L_{feat}^{pred}$ .

2) *Feature adversarial loss*: This loss makes the model delete the undesired information from feature vectors by adversarial learning between the encoders and the discriminators. The loss is given by

$$L_{feat}^{adv} = \mathbb{E}_{o \in O_S}[DD_B(BE(o))] - \mathbb{E}_{o \in O_T}[DD_B(BE(o))] \\ + \mathbb{E}_{o \in O_E}[BD_D(DE(o))] - \mathbb{E}_{o \in O_N}[BD_D(DE(o))]. \quad (4)$$

In this loss function, the output of the behavior encoder is fed to the domain discriminator, and the output of the domain encoder is fed to the behavior discriminator. The learning of the encoders and the discriminators is done in an adversarial manner as

$$\min_{BE, DE} \max_{DD_*, BD_*} L_{feat}^{adv}. \quad (5)$$

Recall that  $BD_*$  learns to assign higher values to expert behavior and to assign lower values to non-expert behavior, and  $DD_*$  learns to assign higher values to the source domain and to assign lower values to the target domain. Thus, the discriminators try to do their best, whereas the encoders try to fool the discriminators.

The first two terms in the RHS of (4) imply that the output of the behavior encoder  $BE$  should *not* contain the domain information. The last two terms in the RHS of (4) imply that the output of the domain encoder  $DE$  should *not* contain the behavioral information.

## A.2 Image Reconstruction and Associated Consistency Check

In the previous subsection, we explained the loss functions of basic adversarial learning for dual feature extraction. Now, we explain the loss functions associated with consistency checks with image reconstruction.

As shown in the middle part of Fig. 3, for image reconstruction, we adopt a *generator* in each of the source and target domains: generator  $G_S$  for the source domain and generator  $G_T$  for the target domain. *Generators*  $G_S$  and  $G_T$  learn to produce images from the feature vectors so that the generated images should resemble the original input images.  $G_S$  takes a source-domain feature vector and a behavior feature vector as input and generates an image that resembles images in the source domain. On the other hand,  $G_T$  takes a target-domain feature vector and a behavior feature vector as input and generates an image that resembles images in the target domain.

Generators  $G_S$  and  $G_T$  learn to optimize the WGAN objective with the help of image discriminators:  $ID_S$  and  $ID_T$ .  $ID_S$  distinguishes real and generated images in the source domain, and  $ID_T$  does so in the target domain. For notational simplicity, we define functions  $G(\cdot, \cdot)$  and  $ID(\cdot, \cdot)$  as

$$G(DE(o), BE(o')) = \begin{cases} G_S(DE(o), BE(o')) & \text{if } o \in O_S \\ G_T(DE(o), BE(o')) & \text{if } o \in O_T \end{cases} \quad (6)$$

$$ID(o) = \begin{cases} ID_S(o) & \text{if } o \in O_S \\ ID_T(o) & \text{if } o \in O_T. \end{cases} \quad (7)$$

1) *Image adversarial loss*: The basic loss function for training the image generators and the associated blocks is image adversarial loss of WGAN learning [2, 16]. The image adversarial loss makes the model generate images that resemble the real ones and is given by

$$L_{img}^{adv} = l^a(SE) + l^a(SN) + l^a(TN) + l^a(TL). \quad (8)$$

where  $l^a(x)$  is the adversarial WGAN loss for a real image in  $O_x$ . In more detail, the first term in the RHS of (8) can be expressed as

$$l^a(SE) = \mathbb{E}_{o \in O_{SE}}[ID(o)] - \mathbb{E}_{(o_x, o_y) \in (O_{SN}, O_{SE})}[ID(G(DE(o_x), BE(o_y)))]. \quad (9)$$

Note that the image discriminator  $ID_*$  learns to assign a high value for a true image and a low value for a fake image. The first term in the RHS of (9) trains the image discriminator  $ID(\cdot)$  to assign a high value to a true image  $o \in O_{SE}$ , whereas the second term in the RHS of (9) trains the image discriminator  $ID(\cdot)$  to assign a low value to a fake image. The latter is because the  $ID(\cdot)$  input, i.e., the generator output  $G(DE(o_x), BE(o_y))$  with  $(o_x, o_y) \in (O_{SN}, O_{SE})$  inside the second term in the RHS of (9) is a fake image; for this image, the behavior feature is taken from  $o_y \in O_{SE}$  but the domain feature is taken from  $o_x \in O_{SN}$  not in  $O_{SE}$ .

The other terms  $l^a(SN)$ ,  $l^a(TN)$  and  $l^a(TL)$  in the RHS of (8) are similarly defined as

$$l^a(SN) = \mathbb{E}_{o \in O_{SN}}[ID(o)] - \mathbb{E}_{(o_x, o_y) \in \hat{O}_{SN, fake}}[ID(G(DE(o_x), BE(o_y)))] \quad (10)$$

$$l^a(TN) = \mathbb{E}_{o \in O_{TN}}[ID(o)] - \mathbb{E}_{(o_x, o_y) \in \hat{O}_{TN, fake}}[ID(G(DE(o_x), BE(o_y)))] \quad (11)$$

$$l^a(TL) = \mathbb{E}_{o \in O_{TL}}[ID(o)] - \mathbb{E}_{(o_x, o_y) \in \hat{O}_{TL, fake}}[ID(G(DE(o_x), BE(o_y)))] \quad (12)$$

where  $\hat{O}_{SN, fake}$  is the set of image combinations  $\{(o_x, o_y)\}$  such that the generated fake image  $G(DE(o_x), BE(o_y))$  has label  $SN$ .  $\hat{O}_{TN, fake}$  and  $\hat{O}_{TL, fake}$  are similarly defined. Specifically,

$$\hat{O}_{SN, fake} = (O_{SE}, O_{SN}) \cup (O_{SE}, O_{TN}) \cup (O_{SN}, O_{TN})$$

$$\hat{O}_{TN, fake} = (O_{SE}, O_{SN}) \cup (O_{SE}, O_{TN}) \cup (O_{SN}, O_{TN})$$

$$\hat{O}_{TL, pair} = (O_{TN}, O_{TL}).$$

With the image adversarial loss  $L_{img}^{adv}$  in (8), the learning is performed in an adversarial manner. The encoders and generators learn to minimize  $L_{img}^{adv}$ , while the image discriminators learn to maximize  $L_{img}^{adv}$ . That is, the image discriminators are trained to distinguish fake images from real images, whereas the encoders and the generators are trained to fool the image discriminators  $ID_*$ .

Note that the image adversarial loss is basically for training the image generators and the associated blocks in a WGAN adversarial manner. With the availability of the image generators  $G_S$  and  $G_T$ , we can impose our first and second consistency criteria: *image reconstruction consistency* and *feature reconstruction consistency*. We define the corresponding loss functions below.

2) *Image reconstruction consistency loss*: This loss checks the feature extraction is properly done. When we combine the features  $S$  and  $B_S$  from  $DE_S$  and  $BE_S$  with an input true image  $o_{SE}$  (or input true image  $o_{SN}$ ) in the first-stage feature extraction and input the feature combination  $(S, B_S)$  into image generator  $G_S$ , the generated image should be the same as the original observation image  $o_{SE}$  (or  $o_{SN}$ ). The same consistency applies to the feature combination  $(T, B)$  in the target domain with a true input image  $o_{TN}$  or  $o_{TL}$  and the image generator  $G_T$ . Thus, the image reconstruction loss is given as

$$L_{img}^{recon} = \mathbb{E}_{o \in O_{ALL}}[l_{mse}(o, \hat{o})] \quad (13)$$

where

$$\hat{o} = G(DE(o), BE(o)), \quad (14)$$

$O_{ALL} = O_{SE} \cup O_{SN} \cup O_{TN} \cup O_{TL}$ , and  $l_{mse}(u, v)$  is the mean square error between  $u$  and  $v$ . The encoders and generators learn to minimize  $L_{img}^{recon}$ .

3) *Feature reconstruction consistency loss*: This is the second self-consistency criterion. If we input the generated source-domain image  $\widetilde{SB}_S$  described in the above image reconstruction loss part into the encoders  $DE_S$  and  $BE_S$ , then we obtain domain feature  $\tilde{S}$  and behavior feature  $\tilde{B}_S$ , and these two features should be the same as the features  $S$  and  $B_S$  extracted in the first-stage feature extraction.

The same principle applies to the target domain. Thus, the *feature reconstruction consistency loss* is expressed as

$$L_{feat}^{recon} = \mathbb{E}_{o \in O_{ALL}} [\|BE(o) - BE(\hat{o})\|_2^2] + \mathbb{E}_{o \in O_{ALL}} [\|DE(o) - DE(\hat{o})\|_2^2] \quad (15)$$

where

$$\hat{o} = G(DE(o), BE(o)), \quad (16)$$

$\|\cdot\|_2$  denotes the 2-norm of a vector, and  $O_{ALL} = O_{SE} \cup O_{SN} \cup O_{TN} \cup O_{TL}$ . Note that  $\hat{o}$  is a generated image from the domain and behavior features extracted from  $o$ , and  $DE(\hat{o})$  and  $BE(\hat{o})$  are the domain and behavior features from the generated image  $\hat{o}$ . The encoders and generators learn to minimize  $L_{feat}^{recon}$ .

### A.3 Cycle-Consistency Check

Now, let us consider our third consistency criterion: *cycle-consistency check* with the right side of Fig. 3. This consistency check involves image translation in the middle part of Fig. 3 and the image retranslation in the right part of Fig. 3 in the main paper, and requires that the original image and the reconstructed image of translation/retranslation should be the same for perfect feature extraction and generation. The *image cycle-consistency loss* is expressed as

$$L_{img}^{cycle} = \mathbb{E}_{(o_x, o_y) \in O_{cycle}^2} [l_{mse}(o_x, G(DE(\hat{o}_{(x,y)}), BE(\hat{o}_{(y,x)})))] \quad (17)$$

where

$$\hat{o}_{(x,y)} = G(DE(o_x), BE(o_y)) \quad (18)$$

$$\hat{o}_{(y,x)} = G(DE(o_y), BE(o_x)) \quad (19)$$

and  $O_{cycle}^2$  is the set of image pairs such that the two images in a pair do not belong to the same domain, i.e., one image belongs to the source domain and the other image belongs to the target domain. The explanation is as follows. Consider that we apply image  $o_x$  to the upper input and image  $o_y$  to the lower input of the left side of Fig. 3 in the main paper. Then,  $\hat{o}_{(x,y)} = G(DE(o_x), BE(o_y))$  is the generated image in the lower row and  $\hat{o}_{(y,x)} = G(DE(o_y), BE(o_x))$  is the generated image in the upper row in the middle part of Fig. 3 in the main paper. Finally, the image  $G(DE(\hat{o}_{(x,y)}), BE(\hat{o}_{(y,x)}))$  is the final reconstructed image in the upper row of the right side of Fig. 3 in the main paper. So, we can check the cycle-consistency between  $o_x$  and  $G(DE(\hat{o}_{(x,y)}), BE(\hat{o}_{(y,x)}))$ . The situation is mirrored when we apply image  $o_x$  to the lower input and image  $o_y$  to the upper input of the left side of Fig. 3 in the main paper. The encoders and generators learn to minimize  $L_{img}^{cycle}$ .

The *feature cycle-consistency loss* is expressed as

$$L_{feat}^{cycle} = \mathbb{E}_{(o_x, o_y) \in O_{cycle}^2} [l_{mse}(DE(o_x), DE(\hat{o}_{(x,y)}))] + \mathbb{E}_{(o_x, o_y) \in O_{cycle}^2} [l_{mse}(BE(o_y), BE(\hat{o}_{(y,x)}))] \quad (20)$$

where

$$\hat{o}_{(x,y)} = G(DE(o_x), BE(o_y)) \quad (21)$$

The explanation is as follows. For example, from the target domain real image  $TB_T$ , we extract domain feature  $T$  and behavior feature  $B_T$ . From these features, we can reconstruct  $TB_T$ . Also, we extract domain feature  $\hat{T}$  (from  $\widehat{TB_S}$ ) and behavior feature  $\hat{B_T}$  (from  $\widehat{SB_T}$ ). From these features, we can reconstruct  $TB_T$ . Let's assume  $\hat{B_T}$  (behavior feature from the source domain image  $\widehat{SB_T}$  generated by  $G_S$ ) is replaced by  $B_T$  (behavior feature from the target domain image  $TB_T$ ). Then from  $\hat{T}$  and  $B_T$  we should still reconstruct  $TB_T$ . That is,  $\hat{B_T}$  (behavior feature from the source domain image  $\widehat{SB_T}$  made by  $G_S$ ) =  $B_T$  (behavior feature from the target domain image  $TB_T$ ). They are behavior features from different domains but they are equal. This implies that the behavior feature is independent of domain information. We name this by feature cycle-consistency because this constraint implicitly satisfies image cycle-consistency. if we explicitly constrain  $\hat{B_T} = B_T$  and  $\hat{T} = T$ , then we can replace  $\hat{B_T}$  and  $\hat{T}$  by  $B_T$  and  $T$ , and the image cycle-consistency is implicitly satisfied.

#### A.4 Other Losses

We further define losses to enhance performance.

1) *Feature regularization loss*: The *feature regularization loss* prevents the feature vector values from exploding for stable learning, and is given by

$$L_{feat}^{reg} = \mathbb{E}_{o \in O_{ALL}} [\|BE(o)\|_2^2 + \|DE(o)\|_2^2]. \quad (22)$$

Instead, more rigorously, we can use the following regularization:

$$\begin{aligned} L_{feat}^{reg,1} &= \mathbb{E}_{o \in O_S} [(\|DE_S(o)\| - c_{norm,d})^2] \\ L_{feat}^{reg,2} &= \mathbb{E}_{o \in O_S} [(\|BE_S(o)\| - c_{norm,b})^2] \\ L_{feat}^{reg,3} &= \mathbb{E}_{o \in O_T} [(\|DE_T(o)\| - c_{norm,d})^2] \\ L_{feat}^{reg,4} &= \mathbb{E}_{o \in O_T} [(\|BE_T(o)\| - c_{norm,b})^2] \\ L_{feat}^{reg} &= L_{feat}^{reg,1} + L_{feat}^{reg,2} + L_{feat}^{reg,3} + L_{feat}^{reg,4}. \end{aligned} \quad (23)$$

Where,  $c_{norm,d}$  and  $c_{norm,b}$  are hyperparameters with non-negative values. Appendix D.2 provides details including the value of  $c_{norm,d}$  and  $c_{norm,b}$  for the experiment.

2) *Feature similarity loss*: This loss aims to map observations of the same domain to similar points in the feature vector space and to map observations of the same behavior to similar points in the feature vector space. The feature similarity loss is defined as

$$L_{feat}^{sim} = \|\mu_{BE(O_{SN})} - \mu_{BE(O_{TN})}\|_2^2 + \|\mu_{DE(O_{SE})} - \mu_{DE(O_{SN})}\|_2^2 + \|\mu_{DE(O_{TN})} - \mu_{DE(O_{TL})}\|_2^2, \quad (24)$$

where  $\mu_{BE(O_x)}$  and  $\mu_{DE(O_x)}$  are the means of the behavior feature vectors and the domain feature vectors over the observation set  $O_x$  ( $x \in \{SE, SN, TN, TL\}$ ), respectively.

#### A.5 Final Loss

Combining the above individual loss functions, we have the final objective for the encoders  $E = (BE_S, DE_S, BE_T, DE_T)$ , the generators  $G = (G_S, G_T)$ , feature discriminators  $FD = (BD_B, DD_B, BD_D, DD_D)$  and image discriminators  $ID = (ID_S, ID_T)$  as follows:

$$\begin{aligned} \min_{E,G} L_{E,G} &= \lambda_{feat}^{adv} L_{feat}^{pred} + \lambda_{feat}^{adv} L_{feat}^{adv} + \lambda_{img}^{adv} L_{img}^{adv} + \lambda_{img}^{recon} L_{img}^{recon} + \lambda_{feat}^{recon} L_{feat}^{recon} \\ &\quad + \lambda_{img}^{cycle} L_{img}^{cycle} + \lambda_{feat}^{cycle} L_{feat}^{cycle} + \lambda_{feat}^{sim} L_{feat}^{sim} + \lambda_{feat}^{reg} L_{feat}^{reg} \end{aligned} \quad (25)$$

$$\min_{FD,ID} L_{FD,ID} = \lambda_{feat}^{adv} L_{feat}^{pred} - \lambda_{feat}^{adv} L_{feat}^{adv} - \lambda_{img}^{adv} L_{img}^{adv} \quad (26)$$

where the weighting factors  $\lambda_{feat}^{adv}$ ,  $\lambda_{feat}^{adv}$ ,  $\lambda_{img}^{adv}$ ,  $\lambda_{img}^{recon}$ ,  $\lambda_{feat}^{recon}$ ,  $\lambda_{img}^{cycle}$ ,  $\lambda_{feat}^{cycle}$ ,  $\lambda_{feat}^{sim}$ ,  $\lambda_{feat}^{reg}$  are hyperparameters and their values are shown in Appendix D. Note that  $L_{feat}^{adv}$  and  $L_{img}^{adv}$  appear in both (25) and (26) with negative sign in (26). Hence, these two terms induce adversarial learning in the overall learning process.

#### A.6 Reward Generation and Learner Policy Update

In this section, we explain the simple method of extracting expert features and training  $D_{rew}$  for reward generation. That is, we just use the output of  $BE_S$  in the source domain with expert input  $o_{SE}$ . In this case,  $D_{rew}$  learns to minimize the following objective while behavior encoder  $BE_T$  is fixed:

$$\begin{aligned} L_D &= \mathbb{E}_{o_{SE} \in O_{SE}} [\log(D_{rew}(BE(o_{SE}))) + \mathbb{E}_{o_{TL} \in O_{TL}} [\log(1 - D_{rew}(BE(o_{TL})))] \\ &\quad + \mathbb{E}_{o_x \in Mix(\hat{o}_{TE}, o_{TL})} [(\|\nabla D_{rew}(BE(o_x))\|_2 - 1)^2]. \end{aligned} \quad (27)$$

where the third expectation in (27) is over the mixture of  $\hat{o}_{TE}$  and  $o_{TL}$  with a certain ratio. The proposed method other than this simple method is explained in Sec. 5.

$D_{rew}$  takes a behavior feature vector as input and predicts its behavior label  $E$  or  $L$  from the input

behavior feature vector.  $D_{rew}$  learns to assign the value 1 to the expert behavior and 0 to the learner behavior. On the other hand,  $\pi_\theta$  learns to generate observations  $O_{TL}$  so that the corresponding behavior feature vector looks like the expert. The learner updates the policy using SAC [17], and the estimated reward for an observation  $o_t$  is defined by

$$\hat{r}(o_t) = \log(D_{rew}(BE_T(o_t))) - \log(1 - D_{rew}(BE_T(o_t))), \quad (28)$$

which is in a similar form to that in [24].

## B Algorithm Pseudo Codes

---

### Algorithm 1 Dual feature extraction and image generation

---

**Input:** The number of epochs  $n_{epoch\_it}$ , domain encoders  $DE = (DE_S, DE_T)$ , behavior encoders  $BE = (BE_S, BE_T)$ , generators  $G = (G_S, G_T)$ , feature discriminators  $FD = (BD_B, DD_B, BD_D, DD_D)$ , image discriminators  $ID = (ID_S, ID_T)$ , observation sets  $O_{SE}, O_{SN}, O_{TN}$  of size  $n_{demo}$ .

Initialize parameters for  $DE, BE, G, FD, ID$ .  
 Make a copy of  $O_{TN}$  and initialize  $O_{TL}$  with the copy.

**for**  $k = 1$  to  $n_{epoch\_it}$  **do**  
   Sample a minibatch of observations  $o_{SE}, o_{SN}, o_{TN}, o_{TL}$  from  $O_{SE}, O_{SN}, O_{TN}, O_{TL}$ , respectively.  
   **for**  $o$  in  $(o_{SE} \cup o_{SN} \cup o_{TN} \cup o_{TL})$  **do**  
     Extract  $DE(o)$  and  $BE(o)$ .  
     Generate  $\hat{o}$  in eq. (14).  
     Extract  $DE(\hat{o})$  and  $BE(\hat{o})$ .  
   **end for**  
   **for**  $o_x, o_y$  (not in the same domain) in  $(o_{SE} \cup o_{SN} \cup o_{TN} \cup o_{TL})$  **do**  
     Generate  $\hat{o}_{(x,y)}$  and  $\hat{o}_{(y,x)}$  in eqs. (18) and (19).  
     Generate  $G(DE(\hat{o}_{(x,y)}), BE(\hat{o}_{(y,x)}))$ .  
   **end for**  
   Compute  $L_{E,G}$  and  $L_{FD,ID}$  in eqs. (25) and (26).  
   Update  $DE, BE$  and  $G$  to minimize  $L_{E,G}$ .  
   Update  $FD$  and  $ID$  to minimize  $L_{FD,ID}$ .  
**end for**  
**return**  $E, G, FD, ID$

---



---

### Algorithm 2 Reward estimation and policy update

---

**Input:** The number of training epochs  $n_{epoch\_pol}$ , the number of discriminator updates  $n_{update,D}$ , the number of policy updates  $n_{update,\theta}$ , domain encoders  $DE$ , behavior encoders  $BE$ , generators  $G$ , discriminator  $D_{rew}$  for reward estimation, learner policy  $\pi_\theta$ , observations sets  $O_{SE}, O_{SN}, O_{TN}$  of size  $n_{demo}$ , replay buffer  $B$  of size  $n_{buffer}$ .

Initialize parameters for  $D_{rew}, \pi_\theta$  and  $B$ .

**for**  $k_1 = 1$  to  $n_{epoch\_pol}$  **do**  
   Sample a trajectory  $\tau \sim \pi_\theta$ .  
   Store transitions  $(s, a, s')$  and observations  $o$  to  $B$ .  
   **for**  $k_2 = 1$  to  $n_{update,D}$  **do**  
     Sample minibatch of observations  $o_{SE} \in O_{SE}, o_{TN} \in O_{TN}, o_{TL} \in B$ .  
     Update  $D_{rew}$  to minimize  $L_D$  in Sec. 5.4.  
   **end for**  
   **for**  $k_3 = 1$  to  $n_{update,\theta}$  **do**  
     Sample minibatch of transitions  $(s, a, s')$  and corresponding observations  $o$ .  
     Compute reward  $\hat{r}$  in Sec. 5.4.  
     Update the policy  $\pi_\theta$  using SAC.  
   **end for**  
**end for**

---

### C Third-Person Imitation Learning (TPIL)

This section summarises TPIL [37], one of the pioneering works that address the domain shift problem in IL. TPIL trains a model based on an unsupervised domain adaptation technique [15] with GAIL [18]. TPIL consists of a single behavior encoder  $BE$ , a domain discriminator  $DD$ , and a behavior discriminator  $BD$ , as shown in Fig. 12. The input label  $XB_X$  in Fig. 12 means that the input is in the  $X$  domain with behavior  $B_X$ .  $X$  can be source  $S$  or target  $T$ , and  $B_X$  can be expert  $E$  or non-expert  $N$ . The key idea is to train  $BE$  to extract domain-independent behavior features from inputs. The trained  $BE$  can be used to tell whether the learner’s action in the target domain is expert behavior or non-expert behavior, and we can use this evaluation to train the learner.  $DD$  learns to predict the domain label (source or target) of the input, and  $BD$  learns to predict the behavior label (expert or non-expert) of the input. Therefore, encoder  $BE$  learns to fool  $DD$  by removing domain information from the input while helping  $BD$  by preserving behavior information from the input. In [37], the behavior feature is a concatenation of  $BE(o_t)$  and  $BE(o_{t-4})$ ; however, we just simply the notation and denote the behavior feature by  $BE(o_t)$ .

The total loss for TPIL  $\mathcal{L}_{TPIL}$  is defined as follows:

$$\mathcal{L}_{TPIL} = \sum_{o_i} \mathcal{L}_{CE}(BD(BE(o_i)), b_i) + \lambda_d \mathcal{L}_{CE}(DD(\mathcal{G}(BE(o_i))), d_i) \quad (29)$$

where  $o_i$  is an image observation,  $\mathcal{L}_{CE}$  is the cross-entropy loss,  $d_i$  is the domain label of  $o_i$  (1 for source domain and 0 for target domain),  $b_i$  is the behavior label of  $o_i$  (1 for expert behavior and 0 for non-expert behavior),  $\lambda_d$  is a hyperparameter, and  $\mathcal{G}$  is a Gradient Reversal Layer (GRL) [15] is defined by

$$\begin{aligned} \mathcal{G}(x) &= x \\ d\mathcal{G}(x)/dx &= -\lambda_g I \end{aligned}$$

where  $\lambda_g$  is a hyperparameter. GRL enables updating  $BE$ ,  $DD$ , and  $BD$  simultaneously using back-propagation. The imitation reward  $r_t$  for an observation  $o_t$  generated by the learner policy is defined by the probability that  $BD$  predicts the observation to be generated by an expert policy, as determined by  $r_t = BD(BE(o_t))$ .

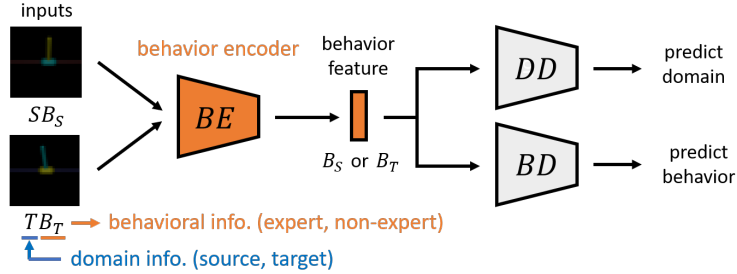

Figure 12: Basic structure for domain-independent behavior feature extraction:  $BE$  - behavior encoder,  $BD$  - behavior discriminator,  $DD$  - domain discriminator



## D Implementation Details

### D.1 Network Architectures

In this section, we explain the network architectures of the components of the proposed method. Table 4 shows the layers for encoders, generators, and discriminators.

Each behavior encoder ( $BE_S$  or  $BE_T$ ) consists of 6 convolutional layers and a flattened layer. The number of output channels for each convolutional layer is (16, 16, 32, 32, 64, 64), and each channel has  $3 \times 3$  size. Zero padding is applied before each convolutional layer, and ReLU activation is applied after each convolutional layer except the last layer. The flattening layer reshapes the input to a one-dimensional vector. The shape of the input is  $(N, W, H, 4C)$ , where  $N$  is the minibatch size,  $W$  and  $H$  are the width and height of each image frame, and  $C$  is the number of channels (for RGB images,  $C = 3$ ). The shape of the behavior feature vector is  $(N, (W/4) \times (H/4) \times 64)$ .

Each domain encoder ( $DE_S$ ,  $DE_T$ ) consists of 6 convolutional layers, a flattened layer, and a linear layer. The number of output channels for each convolutional layer is (16, 16, 32, 32, 64, 64), and each channel has  $3 \times 3$  size. Zero padding is applied before each convolutional layer, and ReLU activation is applied after each convolutional layer. The shape of the input is  $(N, W, H, C)$ , and the shape of the domain feature vector is  $(N, 8)$ .

Each generator ( $G_S$  or  $G_T$ ) consists of 7 transposed convolutional layers. The number of output channels for each layer is (64, 64, 32, 32, 16, 16,  $4C$ ), and each channel has  $3 \times 3$  size. Zero padding is applied before each layer, and ReLU activation is applied after each layer except the last layer. The input is a behavior feature vector and a domain feature vector. The shape of the output is  $(N, W, H, 4C)$ , which is the same as the shape of the input of behavior encoders.

Each feature discriminator ( $BD_B$ ,  $DD_B$ ,  $BD_D$ , or  $DD_D$ ) consists of 2 fully connected layers and a linear layer. Each fully connected layer has 32 hidden units with ReLU activation. Each image discriminator ( $ID_S$  or  $ID_T$ ) consists of 6 convolutional layers, a flattened layer, and a linear layer. Each convolutional layer has  $3 \times 3$  channel size. The number of output channels for each layer is (16, 16, 32, 32, 64, 64). Zero padding is applied before each layer, and ReLU activation is applied after each layer except on the last layer. The discriminator  $D$  for reward estimation consists of 2 fully connected layers and a linear layer. Each fully connected layer has 100 hidden units with ReLU activation. The input size is  $(N, (W/4) \times (H/4) \times 64)$ .

For the SAC algorithm, each actor and the critic consist of 2 fully connected layers and a linear layer. Each fully connected layer has 256 hidden units with ReLU activation.

### D.2 Details for Training Process

Before training the model, we collected expert demonstrations  $O_{SE}$ , and non-expert datasets  $O_{SN}$ ,  $O_{TN}$ .  $O_{SE}$  is obtained by the expert policy  $\pi_E$ , which is trained for 1 million timesteps in the source domain using SAC.  $O_{SN}$  is obtained by a policy taking uniformly random actions in the source domain, and  $O_{TN}$  is obtained by a policy taking uniformly random actions in the target domain. For each IL task, the number of observations (i.e., the number of timesteps) for  $O_{SE}$ ,  $O_{SN}$ ,  $O_{TN}$  is  $n_{demo} = 10000$  except for HalfCheetah-to-locked-legs task, where  $n_{demo} = 20000$  for this task. Each observation consists of 4 RGB images, but the size of these images varies depending on the specific IL task. For IL tasks including IP, IDP, CartPole, and Pendulum, the image size is  $32 \times 32$ . For IL tasks including RE2 and RE3, the image size is  $48 \times 48$ . For IL tasks including HalfCheetah and UMaze, the image size is  $64 \times 64$ . Note that the proposed method does not require a specific input image size.

Our proposed method has two training phases. The first phase updates domain encoders, behavior encoders, generators, feature discriminators, and image discriminators. The second phase updates the discriminator  $D$  for reward estimation and the policy  $\pi_\theta$ . In the first phase, we trained the model for  $n_{epoch\_it} = 50000$  epochs for all IL tasks except for HalfCheetah-to-locked-legs task, where  $n_{epoch\_it} = 200000$  for this task. In each epoch, we sampled a minibatch of size 8 from each dataset  $O_{SE}$ ,  $O_{SN}$ ,  $O_{TN}$ ,  $O_{TL}$ . We set  $O_{TL}$  as a copy of  $O_{TN}$ . For coefficients in Eqs. (25) and (26), we set  $\lambda_{feat}^{pred} = \lambda_{feat}^{adv} = 0.01$ ,  $\lambda_{feat}^{reg} = 0.1$ ,  $\lambda_{img}^{adv} = 1$ ,  $\lambda_{feat}^{sim} = \lambda_{feat}^{recon} = 1000$ ,  $\lambda_{img}^{recon} = \lambda_{img}^{cycle} = 100000$ . We used  $\lambda_{feat}^{cycle} = 10$  for IP-to-color, IDP-to-one, IP-to-two, and PointUMaze-to-ant,  $\lambda_{feat}^{cycle} = 100$

Table 4: Layers for networks in the proposed model. Conv(nc, st, act) denotes a 2D convolutional layer with the number of output channels (nc), stride (st), and activation (act). Conv(nc, st, act) denotes a 2D transposed convolutional layer with the number of output channels (nc), stride (st), and activation (act). FC(nh, act) denotes a fully connected layer with the number of units (nh) and activation (act). Flatten denotes a function that reshapes the input to a one-dimensional vector.

|              |                                                                                                                                                                                                                  |              |                                                                                                                                                        |
|--------------|------------------------------------------------------------------------------------------------------------------------------------------------------------------------------------------------------------------|--------------|--------------------------------------------------------------------------------------------------------------------------------------------------------|
| $BE_S, BE_T$ | Conv(16, 1, ReLU)<br>Conv(16, 1, ReLU)<br>Conv(32, 2, ReLU)<br>Conv(32, 1, ReLU)<br>Conv(64, 2, ReLU)<br>Conv(64, 1, Linear)<br>Flatten                                                                          | $DE_S, DE_T$ | Conv(16, 1, ReLU)<br>Conv(16, 1, ReLU)<br>Conv(32, 2, ReLU)<br>Conv(32, 1, ReLU)<br>Conv(64, 2, ReLU)<br>Conv(64, 1, ReLU)<br>Flatten<br>FC(8, Linear) |
| $BD_B, DD_B$ | FC(32, ReLU)<br>FC(32, ReLU)<br>FC(1, Linear)                                                                                                                                                                    | $BD_D, DD_D$ | FC(32, ReLU)<br>FC(32, ReLU)<br>FC(1, Linear)                                                                                                          |
| $G_S, G_T$   | ConvTranspose(64, 1, ReLU)<br>ConvTranspose(64, 1, ReLU)<br>ConvTranspose(32, 2, ReLU)<br>ConvTranspose(32, 1, ReLU)<br>ConvTranspose(16, 2, ReLU)<br>ConvTranspose(16, 1, ReLU)<br>ConvTranspose(4C, 1, Linear) | $ID_S, ID_T$ | Conv(16, 1, ReLU)<br>Conv(16, 1, ReLU)<br>Conv(32, 2, ReLU)<br>Conv(32, 1, ReLU)<br>Conv(64, 2, ReLU)<br>Conv(64, 1, ReLU)<br>Flatten<br>FC(1, Linear) |
| $D$          | FC(100, ReLU)<br>FC(100, ReLU)<br>FC(1, Linear)                                                                                                                                                                  |              |                                                                                                                                                        |

for IDP-to-color,  $\lambda_{feat}^{cycle} = 100$  for RE3-to-tilted, and  $\lambda_{feat}^{cycle} = 10000$  for RE2-to-tilted, RE3-to-two, RE2-to-three, and HC-to-LF. We used  $\lambda_{feat}^{cycle} = 100$  for all environments from DeepMind Control Suite. We chose these coefficients so that the scale of each loss component is balanced, which was observed to be enough to yield good performances of  $\pi_\theta$ .

As mentioned in Appendix A.4, we adjusted the values of  $c_{norm,d}$  and  $c_{norm,b}$  in Eq. (23) of the proposed method for the experiment. For IL tasks including IP, IDP, RE2, RE3, and HalfCheetah, we set  $c_{norm,d} = c_{norm,b} = 0$ . For IL tasks including CartPole and Pendulum, we set  $c_{norm,d} = 1$  and  $c_{norm,b} = 20$ . For UMaze task, we set  $c_{norm,d} = 1$  and  $c_{norm,b} = 40$ . The ratio between  $c_{norm,d}$  and  $c_{norm,b}$  is determined based on the input image size since the proposed method does not require a specific input image size and produces behavior features of varying sizes depending on the input image size.

In the second phase, we trained  $D$  for reward estimation and  $\pi_\theta$  for  $n_{epoch\_pol}$  epochs, where  $n_{epoch\_pol} = 20$  for IP-to-color, IDP-to-one tasks,  $n_{epoch\_pol} = 30$  for CartPole and Pendulum tasks in DeepMind Control Suite, and  $n_{epoch\_pol} = 100$  for other IL tasks. Each epoch consists of 10000 timesteps. In each epoch, the following process is repeated. We sampled a trajectory from  $\pi_\theta$ , and stored state transitions  $(s, a, s')$  and observations  $o$  to the replay buffer  $B$ . The maximum size of  $B$  is  $n_{buffer} = 100000$ , which is much smaller compared to that in off-policy RL algorithms because of the large memory consumption when storing images in  $B$ . Then,  $D$  is updated for  $n_{update,D}$  times. We  $n_{update,D}$  to be 50 times smaller than the episode length for each IL task. For example, if the episode length is 1000, then  $n_{update,D} = 20$ . For every  $D$  update, we sampled a minibatch of size 128 from each dataset  $O_{SE}$  and  $O_{TN}$ . For  $O_{TL}$ , we sampled a minibatch of size 64 from  $B$  and a minibatch of size 64 from  $O_{TN}$ . After  $D$  update,  $\pi_\theta$  is updated for  $n_{update,\theta}$  times using SAC [17]. We set  $n_{update,\theta}$  to be equal to the episode length for each IL task. For example, if the episode length is 1000, then  $n_{update,\theta} = 1000$ . For every  $\pi_\theta$  update, we sampled a minibatch of size 256 from  $B$ .

In each epoch, we evaluated  $\pi_\theta$  after updating  $D$  and  $\pi_\theta$ . We sampled  $n_{eval}$  trajectories using  $\pi_\theta$  and computed the average return, where each return is computed based on the true reward in the target domain. We set  $n_{eval} = 10$  as default. For IL tasks including Reacher environments, we set

$n_{eval} = 200$  to reduce variance because each return highly depends on the goal position in Reacher environments. We used Adam optimizer [23] for optimizing all networks. We set the learning rate  $lr = 0.001$  and momentum parameters  $\beta_1 = 0.9$  and  $\beta_2 = 0.999$  for encoders, generators, and discriminators. We set  $lr = 0.0003$ ,  $\beta_1 = 0.9$  and  $\beta_2 = 0.999$  for the actor and critic. For SAC, we set the discount factor  $\gamma = 0.99$ , the parameter  $\rho = 0.995$  for Polyak averaging the Q-network, and the entropy coefficient  $\alpha = 0.1$ .

The proposed method is implemented on TensorFlow 2.0 with CUDA 10.0, and we used two Intel Xeon CPUs and a TITAN Xp GPU as the main computing resources. One can use a GeForce RTX 3090 GPU instead as the computing resource, which requires TensorFlow 2.5 and CUDA 11.4. Based on 32x32 images, The GPU memory consumption is about 2.5GB for the training feature extraction model and about 1.5GB during policy update. Note that these highly depend on the image size and the batch size. Our D3IL is implemented based on the code provided by the authors of [6].

### D.3 Dataset and Training Process for PointUMaze-to-Ant Task

For the UMaze environments, the number of observations for  $O_{SE}$ ,  $O_{SN}$  or  $O_{TN}$  is  $n_{demo} = 10000$ . Each observation consists of 4 frames and each frame is a 64x64 RGB image. During the training, the reward that the agent receives for each timestep is  $r_{total} = c \times (r_{IL} + \mathbf{1}_{reach\_goal} \times r_{goal})$ , where  $r_{IL}$  is the estimated reward given by  $D$ ;  $\mathbf{1}_{reach\_goal}$  is 1 if the robot reaches the goal and 0 otherwise;  $r_{goal}$  is the reward when the robot reaches the goal; and  $c > 0$  is a scaling coefficient. In the experiment, we chose  $c = 100$  and  $r_{goal} = 1$ , and these parameters are applied to all baselines. For the proposed method, the number of epochs, minibatch sizes, and network structures for the training feature extraction network and image reconstruction network are the same as those in Appendix D.1. The policy is trained for  $n_{epoch\_pol} = 200$  and each epoch consists of 10000 timesteps, so the total number of timesteps for policy training is 2,000,000.

Also, we trained an agent using a vanilla RL method (SAC [17]) with access to true rewards, to show that it is difficult to obtain expert demonstrations in the target domain. For SAC, the agent receives true rewards. For true rewards, the agent receives a penalty of -0.0001 for each timestep and receives 1000 when the robot reaches the goal, so the maximum true episodic return is 1000.

## E RL Environment Settings and Sample Image Observations

We first describe the base RL tasks in the Gym.

*Inverted pendulum (IP)*: The agent moves a cart to prevent the pole from falling. The episode length is 1000. Unlike the IP task in Gym [4], an episode does *not* terminate midway even if the pole falls. This makes the task much more challenging because each episode provides less useful observations to solve the task.

*Inverted double pendulum (IDP)*: This is a harder version of the IP task where there are two poles on the cart.

*Reacher-two (RE2)*: The agent moves a two-link arm with one end fixed so that the movable endpoint of the arm reaches the target point. The episode length is 50. Unlike the Reacher task in Gym, we narrowed the goal point candidates to 16 points, where the polar coordinate  $(r, \varphi)$  of the target point can be  $r \in \{0.15, 0.2\}$ , and  $\varphi \in \{0, \pi/4, \pi/2, 3\pi/4, \dots, 7\pi/4\}$ .

*Reacher-three (RE3)*: This is a harder version of the RE2 task where the agent moves a three-link armed robot.

Note that our IL tasks are more difficult than those considered in the experiments in the baseline algorithm references [6, 37]. Our simulation setting has an episode length of 1000 for the IP and IDP tasks instead of 50. The episode horizon is also a component of an MDP, and the observation space of the MDP changes as the episode horizon changes. MDP with a longer episode length can yield more various observations which are much different from the initial one, so the observation gap between the source domain and the target domain increases. We meant this for a bigger domain gap.

If the goal position is fixed throughout the entire learning phase in RE tasks, as designed in [6, 37], distinguishing between expert and non-expert behavior solely depends on the arm position. However, in our implementation, the goal position is randomly chosen from 16 positions for each episode. This makes distinguishing expert and non-expert behavior much more challenging because the same arm movement can be considered expert or non-expert behavior depending on the goal position. Therefore, extracting proper behavior features is much more difficult as the feature extraction model should catch the relationship between the arm movement and the goal position.

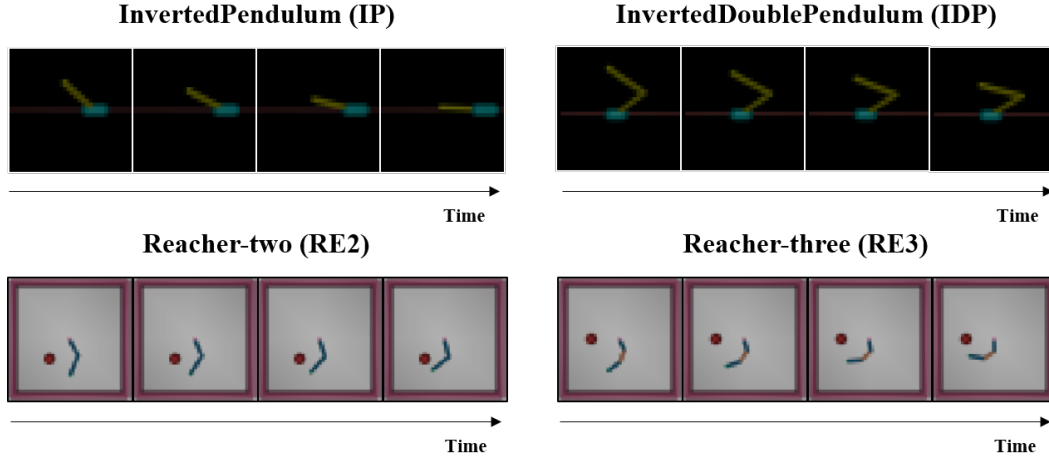

Figure 13: Example observations for IP, IDP, RE2, and RE3 environment

The following images are sample observations for IL tasks with changing a robot’s degree of freedom.

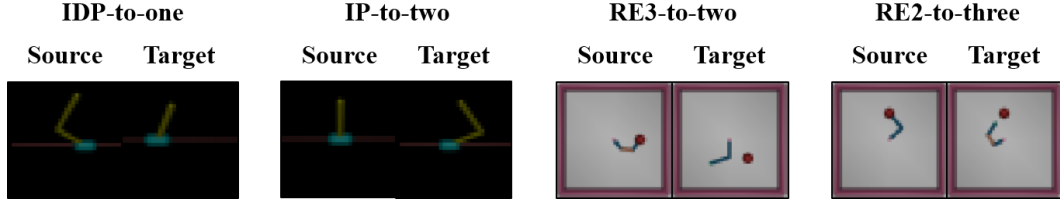

Figure 14: Example image pairs for IL tasks with changing DOF

In the HalfCheetah (HC) environment, the agent controls an animal-like 2D robot. The goal is to move the animal-like 2D robot forward as fast as possible by controlling 6 joints. Similarly to [6], we have a modification with immobilized feet, and this modified environment is 'HalfCheetah-Locked-Feet (HC-LF)'. In the HC-LF environment, the robot can use only 4 joints instead of 6, where the immobilized feet are colored in red.

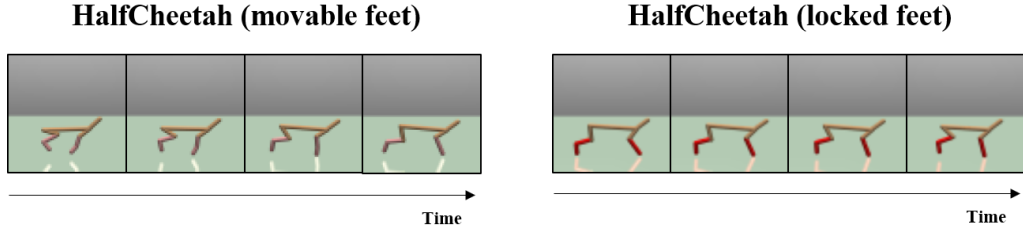

Figure 15: Example observations of HalfCheetah environment

The following images are sample image observations of environments in the DeepMind Control Suite (DMCS). We use CartPole-Balance, CartPole-SwingUp, and Pendulum environments from DMCS. The goal for all environments is to keep the pole upright.

*CartPole-Balance*: The pole starts in an upright position and the agent should move the cart to keep the pole upright while avoiding exceeding the boundaries along the x-axis.

*CartPole-Swingup*: The pole starts in a downward position and the agent should move the cart to swing the pole and keep the pole in an upright position while avoiding exceeding the boundaries along the x-axis.

*Pendulum*: The agent should add torque on the center to swing the pole and keep the pole upright.

Domain adaptation between these tasks is challenging because not only the embodiment between agents in both domains are different but also the distributions of expert and non-expert demonstrations, and initial observations for both domains are quite different.

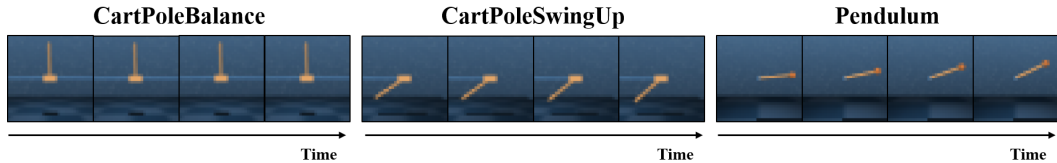

Figure 16: Example observations of environments in DMCS

We omit sample image observations of PointUMaze and AntUMaze environments because they are already provided in the main paper. Table 5 shows the dimensions of state space, action space, and visual observation for RL tasks used in the Experiment section.

Table 5: State dimension, action dimension, and visual observation image size for RL tasks used in the Experiments section. Each visual observation input consists of 4 RGB images, and the rightmost column shows the size (width x height) of each image.

| RL Task                         | State dimension | Action dimension | Visual observation image size |
|---------------------------------|-----------------|------------------|-------------------------------|
| Inverted Pendulum (IP)          | 4               | 1                | 32x32                         |
| Inverted Double Pendulum (IDP)  | 11              | 1                | 32x32                         |
| Reacher-two (RE2)               | 11              | 2                | 48x48                         |
| Reacher-three (RE3)             | 14              | 3                | 48x48                         |
| HalfCheetah (HC)                | 17              | 6                | 64x64                         |
| HalfCheetah-Locked-Feet (HC-LF) | 13              | 4                | 64x64                         |
| Cartpole                        | 5               | 1                | 32x32                         |
| Pendulum                        | 3               | 1                | 32x32                         |
| PointUMaze                      | 7               | 2                | 64x64                         |
| AntUMaze                        | 30              | 8                | 64x64                         |

## F Additional Experimental Results

### F.1 Results on IL Tasks with Changing Visual Effect

We evaluated D3IL on tasks where the domain difference is caused by visual effects on image observations on four IL tasks: IP and IDP, with different color combinations of the pole and cart (IP-to-colored and IDP-to-colored tasks), and RE2 and RE3, with different camera angles (RE2-to-tilted and RE3-to-tilted tasks). Sample image observations are provided in Figure 17. For the IP and IDP tasks, the primary changes occur in the pixel values of the pole and the cart. Meanwhile, for the RE2 and RE3 tasks, major changes are observed in the pixel values of the background outside of the arms and the goal position. The average episodic return for D3IL and the baselines over 5 seeds are shown in Fig. 18. We only included baselines that receive demonstrations as images because changing visual effects on image observations do not affect the true state space and the action space. As shown in Fig. 18, D3IL outperformed the baselines with large margins on IL tasks with changing visual effects on image observations.

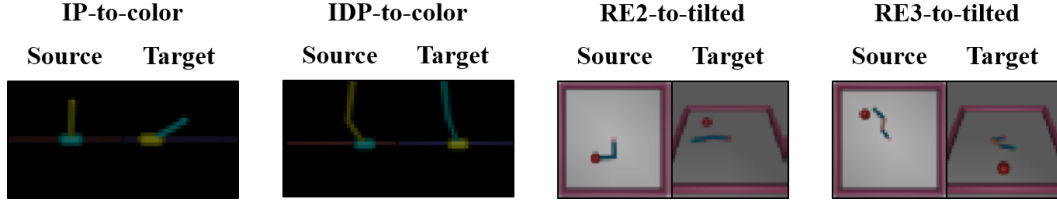

Figure 17: Example image pairs for IL tasks with changing visual effects

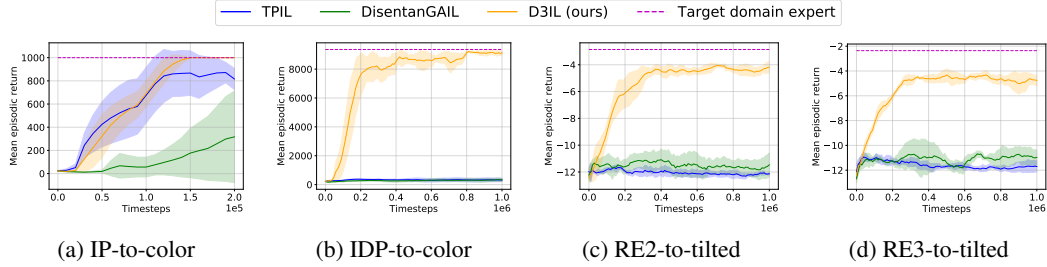

Figure 18: The learning curves in the target domain of the IL tasks with visual effects

## F.2 The Evaluation on the Feature Quality

Fig. 19 shows some instances of the estimated rewards from sampled observations in the RE2-to-three task, corresponding to the time of 150,000 timesteps in Fig. 5d. The left column of Fig. 19 is non-expert behavior and the right column is expert behavior. One side of the Reacher arm is fixed at the center of the image. In the left column, the movable arm end moves away from the goal position through four time-consecutive images, whereas the movable arm end moves towards the goal position in the right column. Note that in these instances, the baseline algorithm assigns a higher reward to the non-expert behavior, whereas the proposed method correctly assigns a higher reward to the expert behavior. We conjecture that this wrong reward estimation of the baseline algorithms based on poor features is the cause of the gradual performance degradation of the baseline algorithms in Fig. 5.

In Fig. 20, we checked the quality of extracted features from a conventional method, TPIL, and that of our method. Since TPIL does not consider image reconstruction but considers only the extraction of domain-independent behavior features. In order to generate an image from the domain-independent behavior feature of TPIL, along with TPIL we also trained two generators ( $G_S, G_T$ ):  $G_S$  takes a behavior feature vector as input and generates an image that resembles the images from the source domain.  $G_T$  takes a behavior feature vector as input and generates an image that resembles the images from the target domain. This  $G_S$  and  $G_T$  training is done with two discriminators ( $ID_S$  and  $ID_T$ ), where  $ID_S$  distinguishes the real and generated images in the source domain, and  $ID_T$  does so in the target domain. As shown in Fig. 20, the reconstructed image from the behavior feature of TPIL is severely broken for the RE2-to-tilted task. Thus, it shows that the "domain-independent" behavior feature of TPIL does not preserve all necessary information of the original observation image. On the other hand, our method based on dual feature extraction and image reconstruction, yields image reconstruction looking like ones. This implies that the features extracted from our method well preserve the necessary information, and thus reconstruction is well done.

|              | Non-expert behavior                                                                 |                                                                                     |                                                                                     |                                                                                     | Expert behavior                                                                      |                                                                                       |                                                                                       |                                                                                       |
|--------------|-------------------------------------------------------------------------------------|-------------------------------------------------------------------------------------|-------------------------------------------------------------------------------------|-------------------------------------------------------------------------------------|--------------------------------------------------------------------------------------|---------------------------------------------------------------------------------------|---------------------------------------------------------------------------------------|---------------------------------------------------------------------------------------|
| D3IL         |  |  |  |  |  |  |  |  |
| TPIL         |  |  |  |  |  |  |  |  |
| DisentanGAIL |  |  |  |  |  |  |  |  |

Figure 19: RE2-to-three: Instances of estimated rewards. Four time-consecutive images comprise one observation. The estimated reward is shown in the fourth image.



|                                        | Conventional IL (TPIL)                                                            |                                                                                   |                                                                                   |                                                                                   | D3IL                                                                               |                                                                                     |                                                                                     |                                                                                     |
|----------------------------------------|-----------------------------------------------------------------------------------|-----------------------------------------------------------------------------------|-----------------------------------------------------------------------------------|-----------------------------------------------------------------------------------|------------------------------------------------------------------------------------|-------------------------------------------------------------------------------------|-------------------------------------------------------------------------------------|-------------------------------------------------------------------------------------|
| IL task                                | IP-to-two                                                                         |                                                                                   | RE2-to-tilted                                                                     |                                                                                   | IP-to-two                                                                          |                                                                                     | RE2-to-tilted                                                                       |                                                                                     |
| Domain                                 | Source                                                                            | Target                                                                            | Source                                                                            | Target                                                                            | Source                                                                             | Target                                                                              | Source                                                                              | Target                                                                              |
| True images observations               |  |  |  |  |  |  |  |  |
| ↓                                      | ↓                                                                                 |                                                                                   | ↓                                                                                 |                                                                                   | ↓                                                                                  |                                                                                     | ↓                                                                                   |                                                                                     |
| Imaged generated to a different domain |  |  |  |  |  |  |  |  |

Figure 20: Examples of real and generated images. The generated images are generated from the feature vectors obtained by conventional TPIL and our proposed method. Here we used IP-to-two and RE2-to-three task, where each task is explained in Sec. 6.1.

### F.3 Experimental Results on Simpler Tasks

In the main result subsection of Sec. 6, we mentioned that the baseline algorithms perform well in the case of easier settings. As a preliminary experiment, we verify the performance of the proposed method and the baseline IL algorithms on simpler IL tasks, which are easier variants of the IL tasks shown in Sections 6.2 and 6.3. We first describe the base RL tasks.

*Inverted pendulum - short (IPshort)*: This is the same task as the IP task, but the episode length is 50.

*Inverted double pendulum - short (IDPshort)*: This is the same task as the IDP task, but the episode length is 50.

*Reacher-two - one goal (RE2onegoal)*: This is the same task as the RE2 task, but the goal point is fixed to  $(x, y) = (1.0, 1.0)$  for the entire training.

*Reacher-three - one goal (RE3onegoal)*: This is the same task as the RE3 task, but the goal point is fixed to  $(x, y) = (1.0, 1.0)$  for the entire training.

Sample visual observations for each IL task are provided in Fig. 21. We followed the training process as described in [6]. For each IL task, we collected  $O_{SE}$ ,  $O_{SN}$  and  $O_{TN}$  of size 10000. The learner policy  $\pi_\theta$  is trained for 20 epochs. Each epoch has 1000 timesteps, so the total number of timesteps is 20000. The size of the replay buffer is 10000. We used TPIL [37] and DisentanGAIL [6] as baseline algorithms. For each IL task, we trained the learner policy using our proposed method and baseline algorithms over 5 seeds. For evaluation, we generated 5 trajectories from  $\pi_\theta$  for every epoch and computed the average return, where the return was computed based on the true reward in the target domain.

Fig. 22 shows the average episodic return. As shown in Fig. 22, the baseline algorithms perform well in these easy IL tasks. The IL tasks shown in Fig. 21 are much easier to solve than the IL tasks in Sections 6.2 and 6.3 because the pole needs to be straight up for only 50 timesteps instead of 1000 timesteps in IPshort and IDPshort, and the goal position is fixed to a single point instead of randomly sampled from 16 candidates in RE2ongol and RE3onegoal. The baselines can achieve good performance on these easy IL tasks. However, as shown in Fig. 5 of the main paper and Fig. 18 in Appendix 6.2, the baseline algorithm yields poor performance on hard IL tasks and the proposed method achieves superior performance on hard IL tasks to the baselines due to the high-quality feature extraction by the dual feature extraction and image reconstruction.

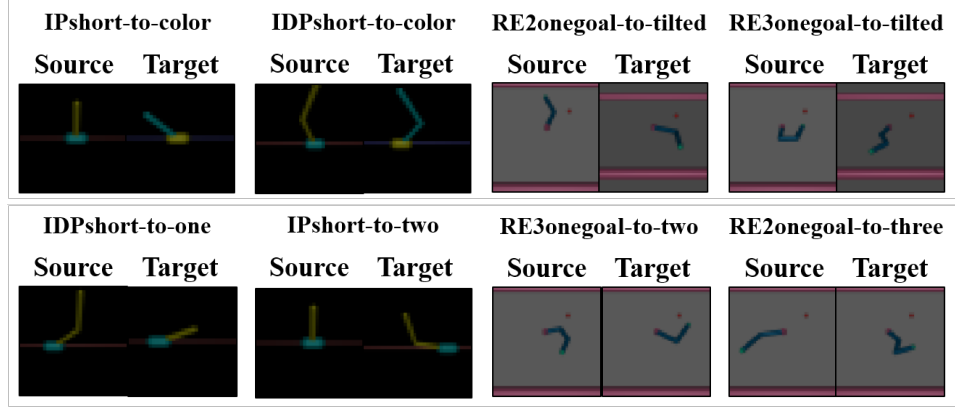

Figure 21: Example observation pairs for each IL task. For each pair of images, the left-hand side is the image in the source domain, and the right-hand side is the image in the target domain.

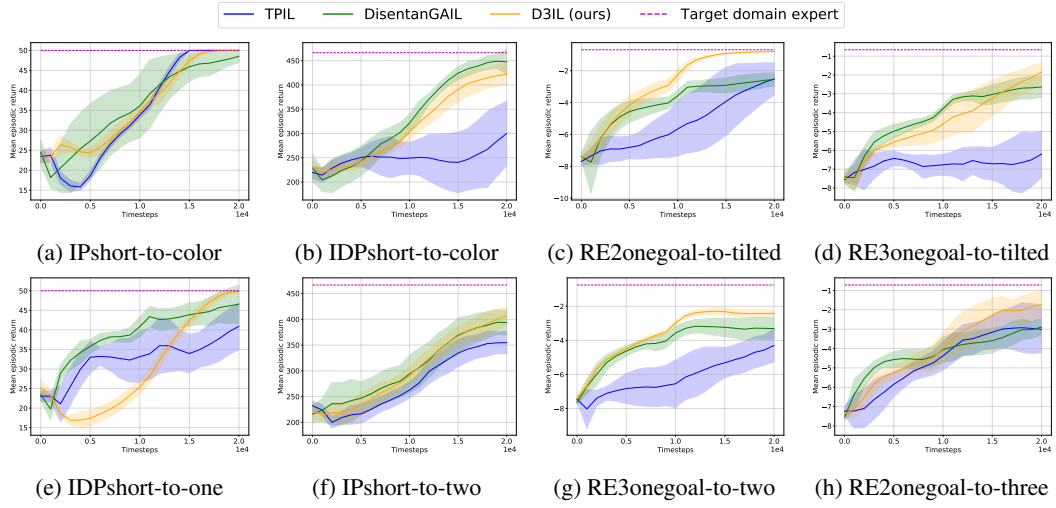

Figure 22: The learning curves for the simpler IL tasks in the target domain

#### F.4 Experiments Results with Single Expert Trajectory during Policy Update

In this section, we investigated whether D3IL can successfully train the target learner when a single trajectory of expert demonstration is available during policy training. For results in Section 6, multiple trajectories of expert demonstrations and non-expert data are provided for D3IL, TPIL, and DisentanGAIL, where the details are provided in Appendix D. Since GWIL calculates the Gromov-Wasserstein distance between expert and learner policies, GWIL can leverage only a single expert trajectory. This is also true for the implementation with the code provided by the authors of [9]. In contrast, the size of the replay buffer  $n_{buffer}$  of GWIL equals the number of training timesteps, which can vary from 200,000 to 2,000,000 depending on the IL task. On the other hand,  $n_{buffer}$  is fixed to 100,000 for D3IL and baselines that utilize image observations. This is due to the huge memory consumption for storing image observations. In this experiment, we evaluated the performance of D3IL under the condition of a single trajectory of expert demonstration during policy training. To provide one trajectory of  $SE$ , and similarly, we supplied  $SN$  and  $TN$  with the same size of  $SE$ . In Reacher environments, we collected one trajectory per goal position for each  $SE$ ,  $SN$ , and  $TN$ , respectively. Fig. 23 shows the average return of D3IL and baselines across 5 seeds.

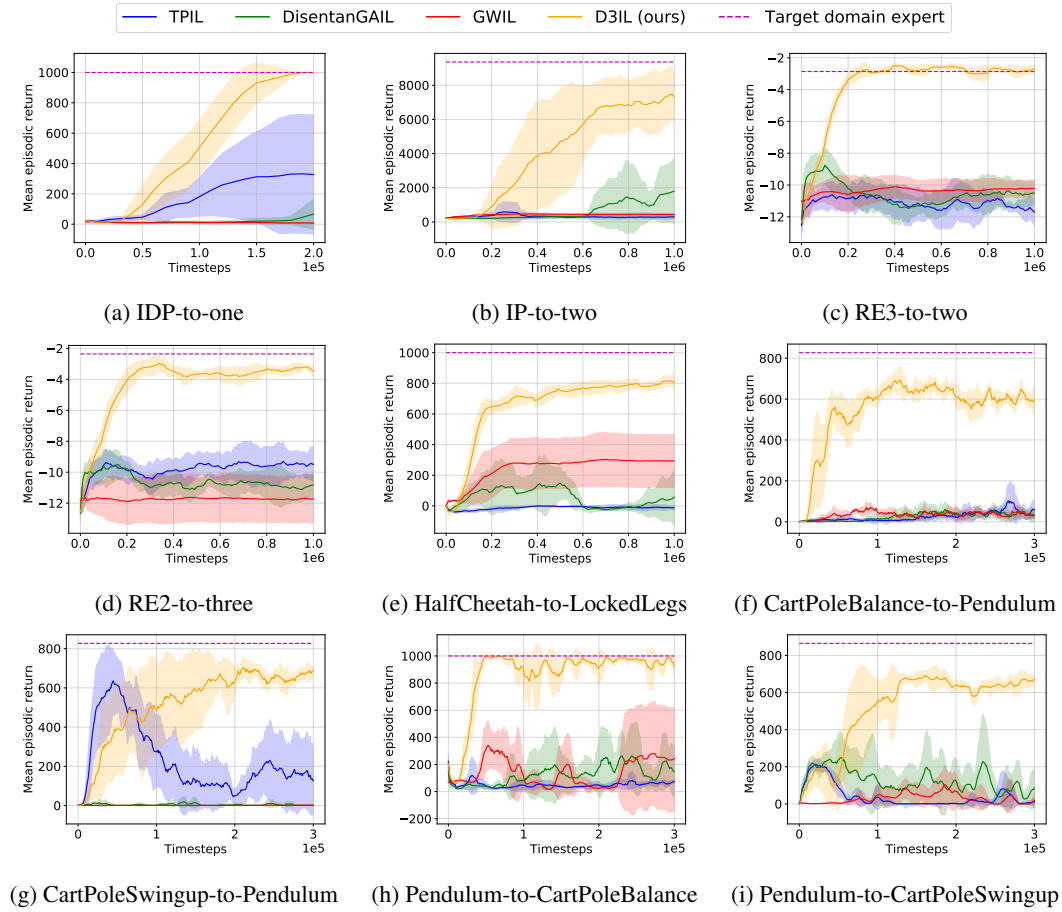

Figure 23: The learning curves for the considered IL tasks when using single expert trajectory

### F.5 Domain Transfer between CartPole-Balance and CartPole-SwingUp

In Section 6.5, we present the results of four IL tasks that use three different environments in DMCS: CartPole-Balance, CartPole-SwingUp, and Pendulum. In these tasks, the robot’s embodiment and dynamics of both domains are the same but their task configuration and initial state distribution of both domains are different. Fig. 24 shows the results of the other two IL tasks where both domains use the CartPole environment. We evaluated D3IL and the baselines on IL tasks for 5 seeds. As illustrated in Fig. 24, all methods failed to solve the CartPole-SwingUp task using demonstrations from the CartPole-Balance task. In contrast, our methods were able to successfully solve the CartPole-Balance task using demonstrations from the CartPole-SwingUp task. This difference in performance can be attributed to the variation in expert demonstrations between the two environments. Demonstrations of the CartPole-SwingUp task typically show images in which the pole is upright, with only a small number of images where the pole is initially pointing downwards and begins to swing up. As a result, an agent for the CartPole-Balance task can learn that expert behavior involves keeping the pole upright and preventing it from falling. In contrast, demonstrations of the CartPole-Balance task typically only show images in which the pole is upright, which means that an agent designed for the CartPole-SwingUp task may not have access to information on expert behavior for swinging up the pole from a downward-pointing position. This problem can be mitigated if non-expert data contains more diverse images from the CartPole-SwingUp task. Our method can also be enhanced by utilizing images generated from the target learner to train our feature extraction model.

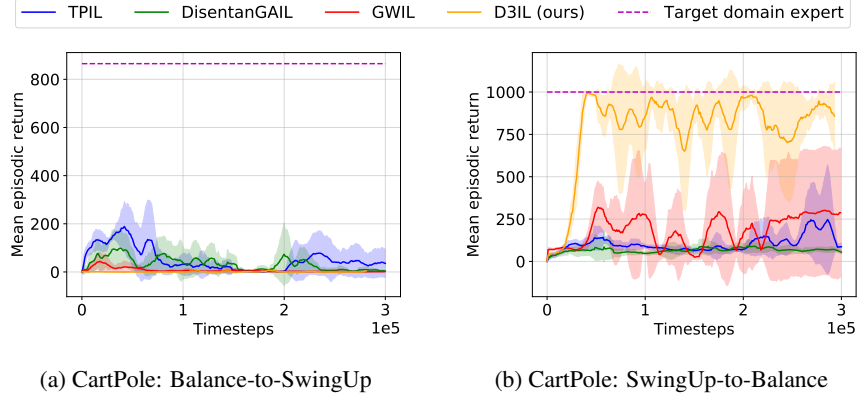

Figure 24: The learning curves for the considered IL tasks for CartPole-Pendulum and CartPole-SwingUp environments

## F.6 Results on Acrobot Environment

In this section, we evaluated D3IL on IL tasks where the target domain is the Acrobot environment in DMCS. In Acrobot, the agent should apply torque to the joint located *between* a two-link pole to make the pole stand upright. The dynamics of the Acrobot environment are much different from those of other environments like CartPole and Pendulum. Although the state and action dimensions of the Acrobot environment are low, achieving high scores in this task is non-trivial. In our implementation, the policy using vanilla RL with SAC, with 10 million timesteps, 256 hidden units for actor and critic networks, and a batch size of 256, obtained the average return of 45.49 across 5 seeds. Figure 25 shows sample observations for the Acrobot environment, where each observation consists of four 32x32 RGB images with corresponding consecutive timesteps.

We evaluated D3IL and baselines on two IL tasks, where the source domain is either CartPole-SwingUp or Pendulum, and the target domain is Acrobot. CartPole-SwingUp and Pendulum are known to be solvable by SAC. We examined whether D3IL can transfer expert knowledge from simpler tasks to more challenging ones. Fig. 26 shows the average episodic return of D3IL and the baselines across 5 seeds. The results demonstrate that D3IL outperforms other baselines, and achieves the average return of vanilla RL using SAC with 10 million timesteps in much smaller timesteps. Our method has the potential to improve if additional information on Acrobot’s dynamics is provided to the model. This can be accomplished by obtaining diverse non-expert data, such as observations from the policy with medium quality or observations from the target learner policy, to train the feature extraction model.

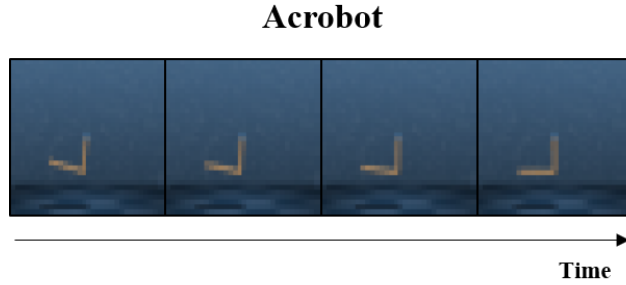

Figure 25: Sample observations on Acrobot task.

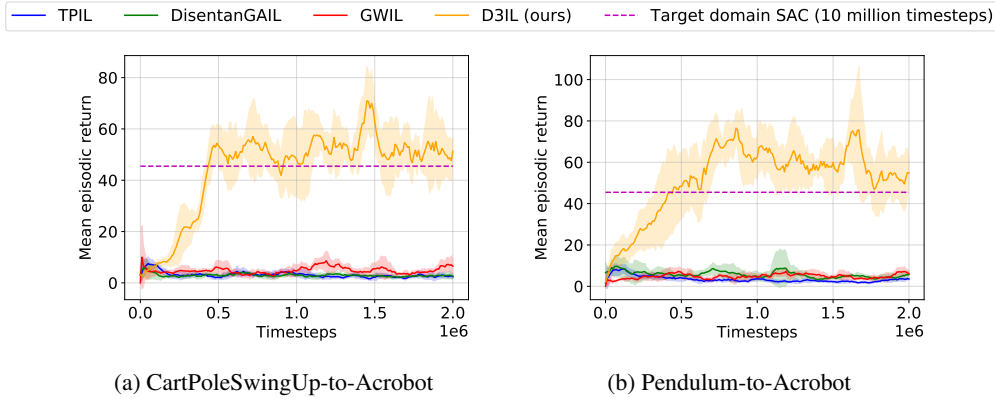

Figure 26: The learning curves for the considered IL tasks with Acrobot as the target domain task

## F.7 Experiment on Walker, Cheetah, and Hopper Task

To assess the effectiveness of our proposed method in more challenging scenarios, we tested our method on IL tasks with domain shifts caused by variations in robot morphology. We employed Walker, Cheetah, and Hopper environments in the DeepMind Control Suite. In these environments, the objective is to propel a 2D robot forward as fast as possible by manipulating its joints. The difficulty arises from the significant difference in the robot morphology and dynamics between the source and target domains. Sample visual observations for each IL task are provided in Fig. 27.

For all environments, we set each episode length to be 200. The expert policy  $\pi_E$  is trained for 3 million timesteps in the source domain using SAC. The number of observations is  $n_{demo} = 1000$  (5 trajectories and each trajectory has a length of 200). Each observation consists of 4 frames and each frame is a 64x64 RGB image.

We evaluated our proposed method and baseline algorithm in three tasks: Walker-to-Cheetah, Walker-to-Hopper, and Cheetah-to-Hopper (denoted as ‘A-to-B’ where ‘A’ is the source domain and ‘B’ is the target domain). A camera generates image observations by observing the robot’s movement. Rewards were assigned to the agent based on the robot’s horizontal velocity, with higher velocity leading to greater rewards. Fig. 28 depicts the learning curve of our method and baselines on three tasks, where each curve shows the average horizontal velocity of the robot in the target domain over three runs. These results demonstrate the superiority of our method over the baselines, which leads us to anticipate that our proposed method can extend to more complicated domains.

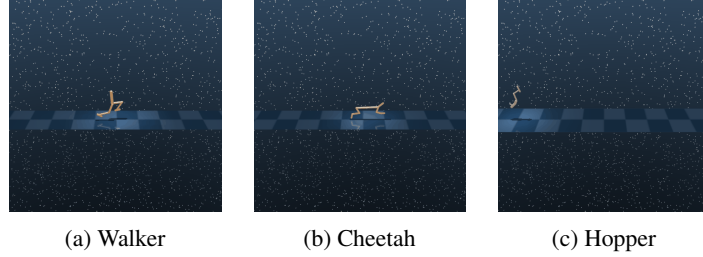

Figure 27: Sample observations for Walker, Cheetah, and Hopper task.

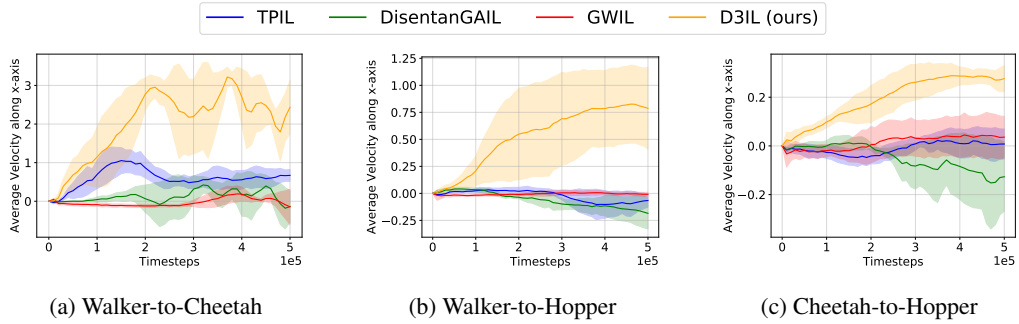

Figure 28: Results on Walker, Cheetah, and Hopper task

## F.8 Visualizing Sample Trajectories for Trained Learner

In this section, we provide visualized sample trajectories of demonstration sequences in the source domain and sequences generated by the learned policy trained in the target domain for qualitative analysis on two tasks: RE2-to-three and PointUMaze-to-Ant. Fig. 29 shows sample trajectories from the source domain expert and target domain learner on the RE2-to-three task. The top row of Fig. 29 shows a sample trajectory of image observations sampled by  $\pi_E$  in the source domain using SAC for 1 million timesteps. The bottom row of Fig. 29 shows a sample trajectory of image observations sampled by  $\pi_\theta$  trained using D3IL for 1 million timesteps in the target domain.

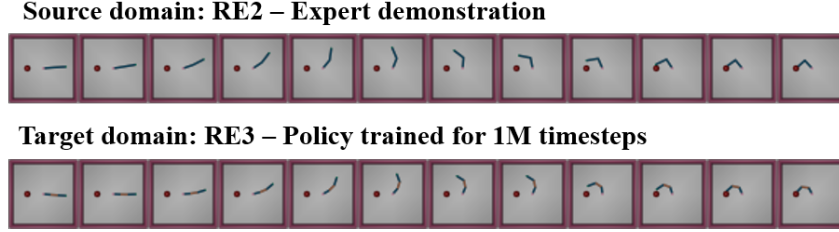

Figure 29: (Top) An example trajectory of image observations generated by  $\pi_E$  in the source domain. (Bottom) An example trajectory of image observations generated by  $\pi_\theta$  trained using D3IL for 1 million timesteps in the target domain.

In Section 6.6, we tested the performance of D3IL on the PointUMaze-to-Ant task. Fig. 30 shows sample trajectories from the source domain expert and target domain learner. The top row of Fig. 30 shows a sample trajectory of image observations sampled by  $\pi_E$  in the source domain using SAC for 0.1 million timesteps. The bottom row of Fig. 30 shows a sample trajectory of image observations sampled by  $\pi_\theta$  trained using D3IL for 2 million timesteps in the target domain. The episode lengths for the trained learner vary when running multiple evaluation trajectories, most of which have episode lengths in the range of 60 to 80. This implies that D3IL can train the agent in the target domain with its dynamics by observing expert demonstrations in the source domain with a different embodiment.

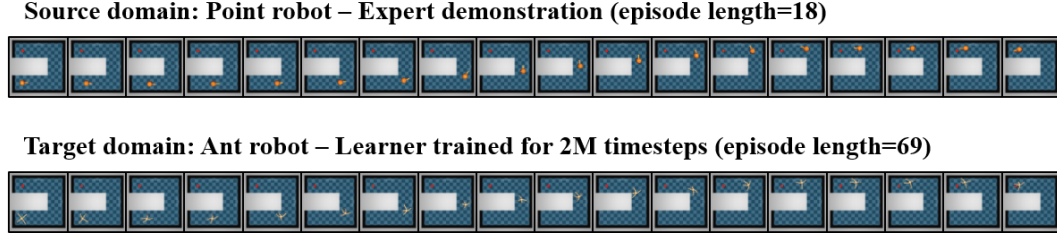

Figure 30: (Top) An example trajectory of image observations generated by  $\pi_E$  in the source domain. In this figure, the interval between two consecutive image frames is 1 timestep, and the total episode length is 18. (Bottom) An example trajectory of image observations generated by  $\pi_\theta$  trained using D3IL for 2 million timesteps in the target domain. In this figure, the interval between two consecutive image frames is 4 timesteps, and the total trajectory length is 69.



## G Further Discussions

**Explanation of the performance gap with GWIL** GWIL is a state-based method, but having access to expert states does not necessarily ensure superior performance. In the original GWIL paper [9], the authors provided simulation results on Pendulum-to-CartpoleSwingUp (Fig. 7 in [9]), showing GWIL achieves 600 points. However, Fig. 7 in [9] assumes that the target-domain learner receives the target-domain sparse reward directly in addition to the IL reward. So, the GWIL result in our paper can be different from that in the GWIL paper. Despite our efforts to tune GWIL’s hyperparameters, GWIL did not show high performance only with the IL reward without direct target-domain sparse reward. Our approach consistently shows better performance in almost all tasks presented in this paper. As the GWIL paper indicates, GWIL can recover the optimal policy only up to isometric transformations. Given that expert demonstrations only cover a fraction of the optimal policy’s scope, recovering the exact optimal policy becomes more difficult. Additionally, GWIL uses Euclidean distance as a metric within each space to compute Gromov-Wasserstein distance, which confines the method to scenarios limited to rigid transformations between domains.

**Broader Impacts** The proposed learning model does not raise significant ethical concerns. However, as an IL algorithm, it should be applied to train models that learn tasks beneficial to society.
